# Frequency-Resolved Correlates of Visual Object Recognition in Human Brain Revealed by Deep Convolutional Neural Networks

Ilya Kuzovkin<sup>1,\*</sup>, Raul Vicente<sup>1,†</sup>, Mathilde Petton<sup>2,3</sup>, Jean-Philippe Lachaux<sup>2,3</sup>, Monica Baciú<sup>4,5</sup>, Philippe Kahane<sup>6,7</sup>, Sylvain Rheims<sup>8,2,9</sup>, Juan R. Vidal<sup>4,5</sup> and Jaan Aru<sup>1,10,\*</sup>,<sup>†</sup>

<sup>1</sup>Computational Neuroscience Lab, Institute of Computer Science, University of Tartu, Estonia

<sup>2</sup>INSERM U1028, CNRS UMR5292, Brain Dynamics and Cognition Team, Lyon Neuroscience Research Center, Lyon, France

<sup>3</sup>Université Claude Bernard, Lyon, France

<sup>4</sup>University Grenoble Alpes, LPNC, F-38040 Grenoble, France

<sup>5</sup>CNRS, LPNC UMR 5105, F38040 Grenoble, France

<sup>6</sup>Inserm, U1216, F-38000 Grenoble, France

<sup>7</sup>Neurology Department, CHU de Grenoble, Hôpital Michallon, F-38000 Grenoble, France

<sup>8</sup>Department of Functional Neurology and Epileptology, Hospices Civils de Lyon and Université Lyon, Lyon, France

<sup>9</sup>Epilepsy Institute, Lyon, France

<sup>10</sup>Department of Penal Law, School of Law, University of Tartu, Estonia

\*Corresponding authors. E-mail: [ilya.kuzovkin@gmail.com](mailto:ilya.kuzovkin@gmail.com); [jaan.aru@gmail.com](mailto:jaan.aru@gmail.com)

<sup>†</sup>These authors contributed equally to this work.

Previous work demonstrated a direct correspondence between the hierarchy of the human visual areas and layers of deep convolutional neural networks (DCNN) trained on visual object recognition. We used DCNNs to investigate which frequency bands carry feature transformations of increasing complexity along the ventral visual pathway. By capitalizing on direct intracranial recordings from 81 patients and 9147 electrodes we assessed the alignment between the DCNN and signals at different frequency bands in different time windows. We found that activity in low and high gamma bands was aligned with the increasing complexity of visual feature representations in the DCNN. These findings show that activity in the gamma band is not only a correlate of object recognition, but carries increasingly complex features along the ventral visual pathway. Similar alignment was found in the alpha frequency highlighting an unexpected role for alpha in contributing to visual object recognition. These results demonstrate the potential that modern artificial intelligence algorithms have in advancing our understanding of the brain.

## 1 Significance Statement

2 Recent advances in the field of artificial intelligence have revealed  
3 principles about neural processing, in particular about vision.  
4 Previous works have demonstrated a direct correspondence  
5 between the hierarchy of human visual areas and layers of deep  
6 convolutional neural networks (DCNNs), suggesting that DCNN  
7 is a good model of visual object recognition in primate brain.  
8 Studying intracranial recordings allowed us to extend previous  
9 works by assessing when and at which frequency bands the activ-  
10 ity of the visual system corresponds to the DCNN. Our key  
11 finding is that signals in gamma and alpha frequencies along  
12 the ventral visual pathway are aligned with the layers of DCNN.  
13 These frequencies play a major role in transforming visual input  
14 to coherent objects.

## Introduction

1 Visual object recognition is mediated by a hierarchy of increas-  
2 ingly complex feature representations along the ventral visual  
3 stream (DiCarlo et al., 2012). Intriguingly, these transformations  
4 are quite similar to the hierarchy of transformations learned by  
5 deep convolutional neural networks (DCNN) trained on natural  
6 images. These developments make it possible to assess whether  
7 putative correlates of visual object recognition also reflect such  
8 gradual transformations. For instance, there is a long-standing  
9 hypothesis that gamma band signals mediate feature binding and  
10 object recognition (Singer and Gray, 1995; Singer, 1999). Clas-  
11 sic studies have demonstrated that visual processing of simple  
12 patterns (gratings) is reflected in strong gamma oscillations in  
13 primary visual cortex (Gray and Singer, 1989). Although these  
14 early studies were only done with simple stimuli and in early  
15 visual cortex, subsequent studies have consistently shown that  
16

1 gamma power increase is related to the recognition of complex  
2 natural objects (Lachaux et al., 2005; Fisch et al., 2009; Vidal  
3 et al., 2010). However, the exact relation between gamma activ-  
4 ity and object recognition is less clear. The classic view is that  
5 gamma band activity signals the emergence of coherent object  
6 representations (Singer and Gray, 1995; Singer, 1999; Fisch et al.,  
7 2009). On the other hand, it is possible that gamma frequencies  
8 carry feature transformations of increasing complexity instead of  
9 reflecting solely the final product of object recognition. The exist-  
10 ence on quantifiable increase of feature complexity along layers  
11 of DCNN allows one to use DCNN as a computational model  
12 to investigate whether signals in the gamma band carry such  
13 increasingly complex features along the ventral visual pathway.

14 It has been shown that DCNN provides the best model out of a  
15 wide range of neuroscientific and computer vision models for the  
16 neural representation of visual images in high-level visual cortex  
17 of monkeys (Yamins et al., 2014) and humans (Khaligh-Razavi  
18 and Kriegeskorte, 2014). Other studies have demonstrated with  
19 fMRI a direct correspondence between the hierarchy of the  
20 human visual areas and layers of the DCNN (Güçlü and van  
21 Gerven, 2015; Eickenberg et al., 2016; Seibert et al., 2016; Cichy  
22 et al., 2016b). Taken together these results support the view  
23 that the increasing feature complexity of the DCNN corresponds  
24 to the increasing feature complexity occurring in visual object  
25 recognition in the primate brain (Kriegeskorte, 2015; Yamins and  
26 DiCarlo, 2016).

27 In the present work we assessed whether there is an alignment  
28 between the responses of layers of the DCNN and the signals in  
29 five distinct frequency bands along the areas constituting the ven-  
30 tral visual pathway. To empirically evaluate the role of gamma  
31 and other frequency bands in visual object recognition we cap-  
32 italized on direct intracranial recordings from 81 patients with  
33 epilepsy and a total of 9147 electrodes implanted throughout the  
34 cerebral cortex. We observed that activity in the gamma range  
35 along the ventral pathway is statistically significantly aligned  
36 with the activity along the layers of DCNN: gamma (31 – 150  
37 Hz) activity in the early visual areas correlates with the activ-  
38 ity of early layers of DCNN, while the gamma activity of higher  
39 visual areas is better captured by the higher layers of the DCNN.  
40 Surprisingly, we also observed such alignment in the alpha band  
41 (9 – 14 Hz). We also found that neural activity in the theta range  
42 (5 – 8 Hz) throughout the visual hierarchy correlated with higher  
43 layers of DCNN.

## 44 Materials and Methods

45 Our methodology involves four major steps described in the fol-  
46 lowing subsections. In “Patients and Recordings” we describe  
47 the visual recognition task and the data collection. In “Process-  
48 ing of Neural Data” we describe the artifact rejection, extraction  
49 of spectral features and the electrodes selection processes. “Pro-  
50 cessing of DCNN Data” shows how we extract DCNN layers’  
51 responses to the same images as used in the visual recognition  
52 task. In the last step we map neural activity to the layers of  
53 DCNN using representational similarity analysis. See Figure 1  
54 for the illustration of the analysis workflow.

## Patients and Recordings

81 patients of either gender with drug-resistant partial epilepsy  
and candidates for surgery were considered in this study and  
recruited from Neurological Hospitals in Grenoble and Lyon  
(France). All patients were stereotactically implanted with multi-  
lead EEG depth electrodes (DIXI Medical, Besançon, France).  
All participants provided written informed consent, and the  
experimental procedures were approved by local ethical commit-  
tee of Grenoble hospital (CPP Sud-Est V 09-CHU-12). Recording  
sites were selected solely according to clinical indications, with  
no reference to the current experiment. All patients had normal  
or corrected to normal vision.

### Electrode Implantation

Eleven to 15 semi-rigid electrodes were implanted per patient.  
Each electrode had a diameter of 0.8 mm and was comprised  
of 10 or 15 contacts of 2 mm length, depending on the target  
region, 1.5 mm apart. The coordinates of each electrode con-  
tact with their stereotactic scheme were used to anatomically  
localize the contacts using the proportional atlas of Talairach  
and Tournoux (Talairach and Tournoux, 1993), after a linear  
scale adjustment to correct size differences between the patients  
brain and the Talairach model. These locations were further  
confirmed by overlaying a post-implantation CT scan (show-  
ing contact sites) with a pre-implantation structural MRI with  
VOXIM<sup>®</sup> (IVS Solutions, Chemnitz, Germany), allowing direct  
visualization of contact sites relative to brain anatomy.

All patients voluntarily participated in a series of short exper-  
iments to identify local functional responses at the recorded sites  
(Vidal et al., 2010). The results presented here were obtained  
from a test exploring visual recognition. All data were recorded  
using approximately 120 implanted depth electrode contacts per  
patient with a sampling rate of 512 Hz. Data were obtained in a  
total of 9147 recording sites.

### Stimuli and Task

The visual recognition task lasted for about 15 minutes. Patients  
were instructed to press a button each time a picture of a fruit  
appeared on screen (visual oddball paradigm). Non-target stim-  
uli consisted of pictures of objects of eight possible categories:  
houses, faces, animals, scenes, tools, pseudo words, consonant  
strings, and scrambled images. The last three categories were  
not included in this analysis. All the included stimuli had the  
same average luminance. All categories were presented within an  
oval aperture (illustrated on Figure 1). Stimuli were presented  
for a duration of 200 ms every 1000 – 1200 ms in series of 5  
pictures interleaved by 3-s pause periods during which patients  
could freely blink. Patients reported the detection of a target  
through a right-hand button press and were given feedback of  
their performance after each report. A 2-s delay was placed after  
each button press before presenting the follow-up stimulus in  
order to avoid mixing signals related to motor action with signals  
from stimulus presentation. Altogether, we measured responses  
to 269 natural images.

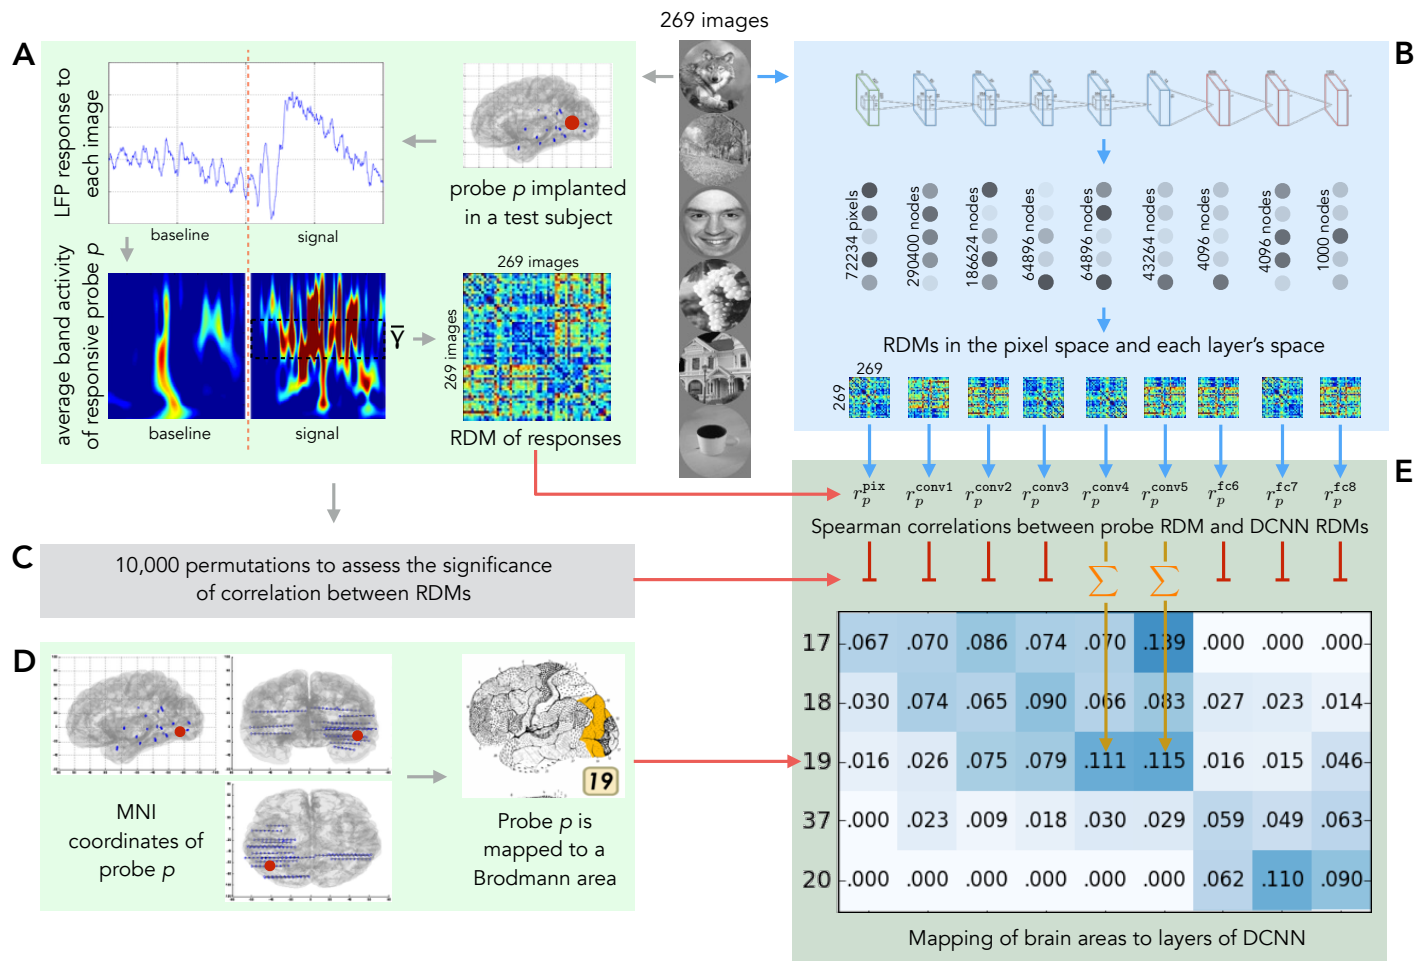

**Figure 1** Overview of the analysis pipeline. 269 natural images are presented to human subjects (panel A) and to an artificial vision system (panel B). The activities elicited in these two systems are compared in order to map regions of human visual cortex to layers of deep convolutional neural networks (DCNNs). **A**: LFP response of each of 9147 electrodes to each of the images is converted into the frequency domain. Activity evoked by each image in the frequency band and time of interest is compared to the activity evoked by every other image and results of this comparison are presented as a representational dissimilarity matrix (RDM). **B**: Each of the images is shown to a pre-trained DCNN and activations of each of the layers are extracted. Each layer's activations form a representation space, in which stimuli (images) can be compared to each other. Results of this comparison are summarized as a RDM for each DCNN layer. **C**: Subject's intracranial responses to stimuli are randomly reshuffled and the analysis depicted in panel A is repeated 10000 times to obtain 10000 random RDMs for each electrode. **D**: Each electrode's MNI coordinates are used to map the electrode to a Brodmann area. The figure also gives an example of electrode implantation locations in one of the subjects (blue circles are the electrodes). **E**: Spearman's rank correlation is computed between the true (non-permuted) RDM of neural responses and RDMs of each layer of DCNN. Also 10000 scores are computed with the random RDM for each electrode-layer pair to assess the significance of the true correlation score. If the score obtained with the true RDM is significant ( $p < 0.001$ ), then the score is added to the mapping matrix. The procedure is repeated for each electrode and the correlation scores are summed and normalized by the number of electrodes in a Brodmann area. The resulting mapping matrix shows the alignment between the consecutive areas of the ventral stream and layers of DCNN.

## 1 Processing of Neural Data

2 The final dataset consists of 2460543 local field potential (LFP)  
3 recordings – 9147 electrode responses to 269 stimuli.

4 To remove the artifacts the signals were linearly detrended  
5 and the recordings that contained values  $\geq 10\sigma_{images}$ , where  
6  $\sigma_{images}$  is the standard deviation of responses (in the time win-  
7 dows from  $-500\text{ms}$  to  $1000\text{ms}$ ) of that particular probe over  
8 all stimuli, were excluded from data. All electrodes were re-  
9 referenced to a bipolar reference. The signal was segmented in

the range from  $-500$  ms to  $1000$  ms, where  $0$  marks the moment  
when the stimulus was shown. The  $-500$  to  $-100$  ms time win-  
dow served as the baseline. There were three time windows in  
which the responses were measured:  $50 - 250$  ms,  $150 - 350$  ms  
and  $250 - 450$  ms.

We analyzed five distinct frequency bands:  $\theta$  ( $5 - 8$  Hz),  $\alpha$   
( $9 - 14$  Hz),  $\beta$  ( $15 - 30$  Hz),  $\gamma$  ( $31 - 70$  Hz) and  $\Gamma$  ( $71 - 150$  Hz).  
To quantify signal power modulations across time and frequency  
we used standard time-frequency (TF) wavelet decomposition

(Daubechies, 1990). The signal  $s(t)$  is convoluted with a complex Morlet wavelet  $w(t, f_0)$ , which has Gaussian shape in time ( $\sigma_t$ ) and frequency ( $\sigma_f$ ) around a central frequency  $f_0$  and defined by  $\sigma_f = 1/2\pi\sigma_t$  and a normalization factor. In order to achieve good time and frequency resolution over all frequencies we slowly increased the number of wavelet cycles with frequency ( $\frac{f_0}{\sigma_f}$  was set to 6 for high and low gamma, 5 for beta, 4 for alpha and 3 for theta). This method allows obtaining better frequency resolution than by applying a constant cycle length (Delorme and Makeig, 2004). The square norm of the convolution results in a time-varying representation of spectral power, given by:  $P(t, f_0) = |w(t, f_0)s(t)|^2$ .

Further analysis was done on the electrodes that were responsive to the visual task. We assessed neural responsiveness of an electrode separately for each region of interest – for each frequency band and time window we compared the average post-stimulus band power to the average baseline power with a Wilcoxon signed-rank test for matched-pairs. All p-values from this test were corrected for multiple comparisons across all electrodes with a false discovery rate (FDR) procedure (Genovese et al., 2002). In the current study we deliberately kept only positively responsive electrodes, leaving the electrodes where the post-stimulus band power was significantly weaker than the average baseline power for future work. Table 1 contains the numbers of electrodes that were used in the final analysis in each of 15 regions of interest across the time and frequency domains.

|              | $\theta$ | $\alpha$ | $\beta$ | $\gamma$ | $\Gamma$ |
|--------------|----------|----------|---------|----------|----------|
| 50 – 250 ms  | 1299     | 709      | 269     | 348      | 504      |
| 150 – 350 ms | 1689     | 783      | 260     | 515      | 745      |
| 250 – 450 ms | 1687     | 802      | 304     | 555      | 775      |

**Table 1** Number of positively responsive electrodes in each of the 15 regions of interest in a time-resolved spectrogram.

Each electrode’s MNI coordinates were mapped to a corresponding Brodmann brain area (Brodmann, 1909) using Brodmann area atlas contained in MRICron (Rorden, 2007) software.

To summarize, once the neural signal processing pipeline is complete, each electrode’s response to each of the stimuli is represented by one number – the average band power in a given time window normalized by the baseline. The process is repeated independently for each region of interest.

## Processing of DCNN Data

We feed the same images that were shown to the test subjects to a deep convolutional neural network (DCNN). We use **Caffe** (Jia et al., 2014) implementation of **AlexNet** (Krizhevsky et al., 2012) architecture (see panel B of Figure 1) trained on **ImageNet** (Russakovsky et al., 2015) dataset to categorize images into 1000 classes. Although the image categories used in our experiment are not exactly the same as the ones in the **ImageNet** dataset, they are a close match and DCNN is successful in labelling them.

For each of the images we stored the activations of all nodes of DCNN. As the network has 8 layers of nodes we obtained 9 representations of an image: the image itself (referred to as layer 0) in the pixel space and the activation values of each of the

layers of DCNN. See table 1 for the full list of feature spaces that are used in this work to represent an image.

| Space                      | Cardinality |
|----------------------------|-------------|
| Layer 0: pixels            | 72234       |
| Layer 1: convolutional     | 290400      |
| Layer 2: convolutional     | 186624      |
| Layer 3: convolutional     | 64896       |
| Layer 4: convolutional     | 64896       |
| Layer 5: convolutional     | 43264       |
| Layer 6: fully connected   | 4096        |
| Layer 7: fully connected   | 4096        |
| Layer 8: fully connected   | 1000        |
| Neural activity of a probe | 1           |

**Table 2** Ten possible representations of an image and their dimensionalities.

## Mapping Neural Activity to Layers of DCNN

Once we extracted features from both neural and DCNN responses our next goal was to compare the two and use a similarity score to map the brain area where a probe was located to a layer of DCNN. By doing that for every probe in the dataset we obtained cross-subject alignment between visual areas and layers of DCNN.

Recent studies comparing the responses of visual cortex with the activity of DCNN have used two types of mapping methods. The first type is based on linear regression models that predict neural responses from DCNN activations (Güçlü and van Gerven, 2015). The second type is based on representational similarity analysis (RSA) (Kriegeskorte et al., 2008). RSA is used to compare distances between stimuli in the neural response space and in the DCNN activation space (Cichy et al., 2016a). We employed RSA, but qualitatively similar results were obtained by us with the regularized linear regression method.

### Representational Dissimilarity Matrices

First we built a representation dissimilarity matrix (RDM) of size *number of stimuli*  $\times$  *number of stimuli* (in our case  $269 \times 269$ ) for each of the features spaces (see Table 2). Given a matrix  $\text{RDM}_{ij}^{\text{feature space}}$  a value  $\text{RDM}_{ij}^{\text{feature space}}$  in the  $i$ th row and  $j$ th column of the matrix shows the euclidean distance between the vectors  $\mathbf{v}_i$  and  $\mathbf{v}_j$  that represent images  $i$  and  $j$  respectively in that particular feature space. In our case there are 10 different features spaces (listed in Table 2) in which a stimulus (an image) can be represented: the original pixel space, 8 feature spaces for each of the layers of the DCNN and one space where an image is represented by the preprocessed neural response of probe  $p$ . To analyse one region of interest (for example high gamma in 50 – 250 ms time window) we computed 9147 RDM matrices on the neural responses – one for each electrode, and 9 RDM matrices on the activations of the layers of DCNN.

## 1 Representational Similarity Analysis

The second step was to compare the  $\text{RDM}^{\text{probe } p}$  of each probe  $p$  with RDMs of layers of DCNN. The similarity measure we used was Spearman's rank correlation between the matrices:

$$\text{score}_{\text{layer } l}^{\text{probe } p} = \text{Spearman}(\text{RDM}^{\text{probe } p}, \text{RDM}^{\text{layer } l}).$$

2 As a result of comparing  $\text{RDM}^{\text{probe } p}$  with every  $\text{RDM}^{\text{layer } l}$  we  
 3 obtain 9 scores:  $\text{score}_{\text{pixels}} \dots \text{score}_{\text{fc8}}$  that serve as a distributed  
 4 mapping of probe  $p$  to the layers of DCNN (see panel E of Figure  
 5 1). The procedure is repeated independently for each of the 9147  
 6 probes.

## 7 Statistical significance

8 To assess the statistical significance of the correlations between  
 9 the RDM matrices we run a permutation test. In particular, we  
 10 reshuffled the vector of brain responses to images 10000 times,  
 11 each time obtaining a dataset where the causal relation between  
 12 the stimulus and the response is destroyed. On each of those  
 13 datasets we ran the analysis and obtained the Spearman's rank  
 14 correlation scores. To determine a  $p$ -value we compared the score  
 15 obtained on the original (unshuffled) data with the distribution of  
 16 scores obtained with the surrogate data. If the score obtained on  
 17 the original data was bigger than the respective maximal value  
 18 obtained on the surrogate sets we considered the score to be  
 19 significantly different ( $p \leq 0.0001$ ).

## 20 Quantifying properties of the mapping

To evaluate the results quantitatively we devised a set of mea-  
 21 sures. *Volume* is the total sum of significant correlations between  
 22 the probes in a particular brain area and layers of DCNN. *Volume*  
 23 *of visual activity in layers L* is defined as

$$V_L = \sum_{l \in L} \sum_{p \in S_l} r_l^p,$$

24 where  $S_l$  is the set of all probes from in visual areas that sign-  
 25 significantly correlate with layer  $l$ . *Visual specificity* is the ratio  
 26 between *volume* in visual areas and total *volume*. The ratio of  
 27 *complex* visual features to all visual features is defined as the  
 28 total volume mapped to layers *conv5*, *fc6*, *fc7* divided by the  
 29 total volume mapped to layers *conv1*, *conv2*, *conv3*, *conv5*, *fc6*,  
 30 *fc7*. Note that for this measure layers *conv4* and *fc8* are omitted:  
 31 layer *conv4* is considered to be the transition between the layers  
 32 with low and high complexity features, while layer *fc8* directly  
 33 represents class probabilities. *Alignment* between the activity in  
 34 the visual areas and activity in DCNN is estimated as Spearman's  
 35 rank correlation between the vector of electrode assignments to  
 36 visual areas and the vector of electrode assignments to DCNN  
 37 layers. As both the ventral stream and the hierarchy of layers in  
 DCNN have an increasing complexity of visual representations,  
 the relative ranking within the biological system should coincide  
 with the ranking within the artificial system.

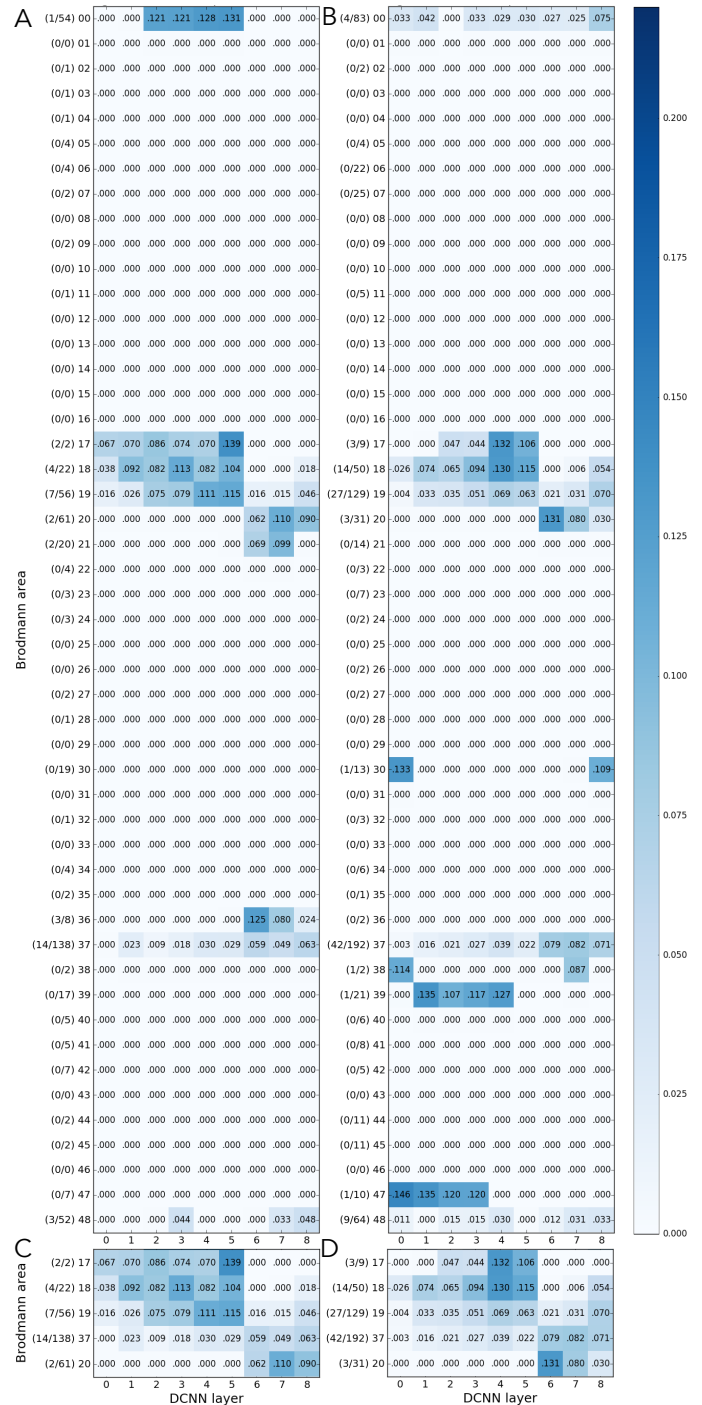

**Figure 2** Mapping of the activity in Brodmann areas to DCNN layers. Underlying data comes from the activity in low gamma (31-70 Hz, subfigures A and C) and high gamma (71-150 Hz, subfigures B and D) bands in 150-350 ms time window. C and D are subselection of the areas that constitute ventral stream: 17, 18, 19, 37, 20. There are two important observations to be made out of this plot: a) statistically significant neural responses are specific to visual areas b) the alignment between the ventral stream and layer of DCNN is clearly visible. Area 0 contains the regions of the brain not mapped by the atlas. The numbers on the left of each panel show the number of significantly correlating probes in each area out of the total number of responsive probes in that area, and the Brodmann area number.

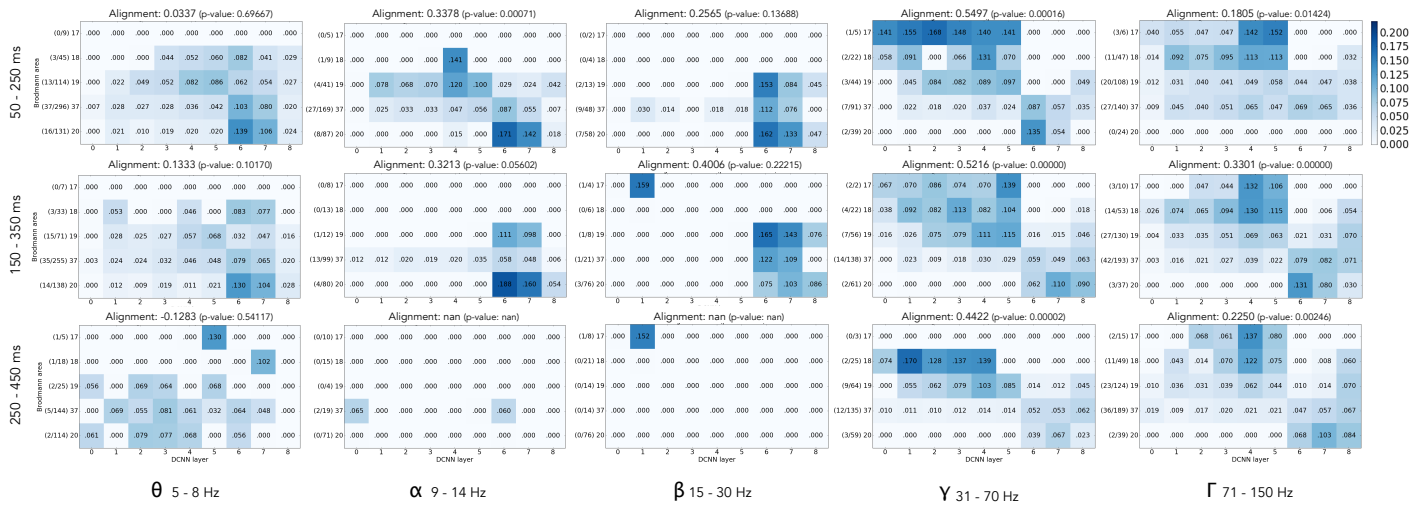

**Figure 3** Mapping of activity in visual areas to activations of layers of DCNN across five frequency bands and three time windows. The alignment score is computed as Spearman correlation between electrode assignment to areas and electrode assignment to DCNN layers. The numbers on the left of each subplot show the number of significantly correlating probes in each area out of the total number of responsive probes in that area, and the Brodmann area number.

## 1 Results

### 2 Increasing complexity of visual representations is captured by gamma and early alpha band activity

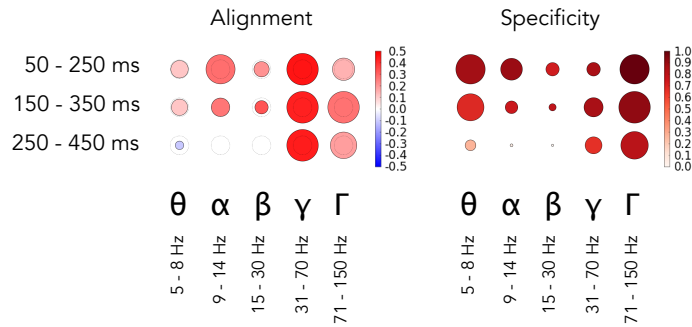

**Figure 4** Overall relative statistics of brain responses across frequency bands and time windows. The left panel shows Spearman correlation between the electrode assignment to brain areas and the electrode assignment to DCNN layers: the color indicates the correlation strength, size of the marker shows the logarithm (so that not significant results are still visible on the plot) of inverse of the statistical significance of the correlation, dotted circle indicates  $p = 0.05$  significance threshold. The right panel shows how specific to visual areas the activity is: intensive red means that most of the activity in that band and time window happened in visual areas, size of the marker indicates the total amount of activity (sum of correlations between the RDM matrices of the electrodes in that brain area and the RDM matrices of the DCNN layers). The maximal size of a marker is defined by the biggest marker on the figure.

4 We tested the hypothesis that gamma activity carries increas-  
 5 ingly complex features along the ventral stream. To that end we  
 6 assessed the alignment of neural activity in different frequency

bands and time windows to the activity of different layers of  
 a DCNN. In particular, we used RSA to compare the repre-  
 2 sentational geometry of different DCNN layers and the activity  
 3 patterns of different frequency bands of single electrodes (see  
 4 Figure 1). We consistently found that signals in low gamma  
 5 (31 – 70 Hz) and high gamma (71 – 150 Hz) frequencies aligned  
 6 with the DCNN in a specific way: increase of the complexity of  
 7 features along the layers of the DCNN was matched by the trans-  
 8 formation in the representational geometry of responses to the  
 9 stimuli along the ventral stream. In other words, the lower and  
 10 higher layers of the DCNN explained gamma band signals from  
 11 earlier and later visual areas, respectively.

Figure 2 illustrates assignment of neural activity in low  
 gamma band (panel A) and high gamma band (panel B) to  
 14 Brodmann areas and layers of DCNN. As one can see most of  
 15 the activity was assigned to visual areas (areas 17, 18, 19, 37,  
 16 20). Focusing on these areas (panels C, D) revealed a diagonal  
 17 trend that illustrated the alignment between ventral stream and  
 18 layers of DCNN. Left panel of Figure 4 summarizes our find-  
 19 ings across all subjects, time windows and frequency bands. The  
 20 alignment in the gamma bands was present in all three time  
 21 windows (50 – 250 ms, 150 – 350 ms, 250 – 450 ms). We note  
 22 that the alignment in the gamma bands is also present at the  
 23 single-subject level as can be seen in Figure 6.

Apart from the alignment we looked at the total amount of  
 25 correlation and its specificity to visual areas. On the right panel  
 26 of Figure 4 we can see that the volume of significantly correlating  
 27 activity was highest in the high gamma range. Remarkably, in  
 28 50 – 250 ms time window the 97% of that activity was located  
 29 in visual areas. Also in Figure 2 we see that in the gamma range  
 30 only a few electrodes were assigned to other Brodmann areas.

In addition to the gamma bands alignment to the DCNN  
 32 was detected in the alpha (9 – 14 Hz) frequency range. This  
 33 alignment was significant only in the earliest time window  
 34 (50 – 250ms) as can be seen in Figure 4.

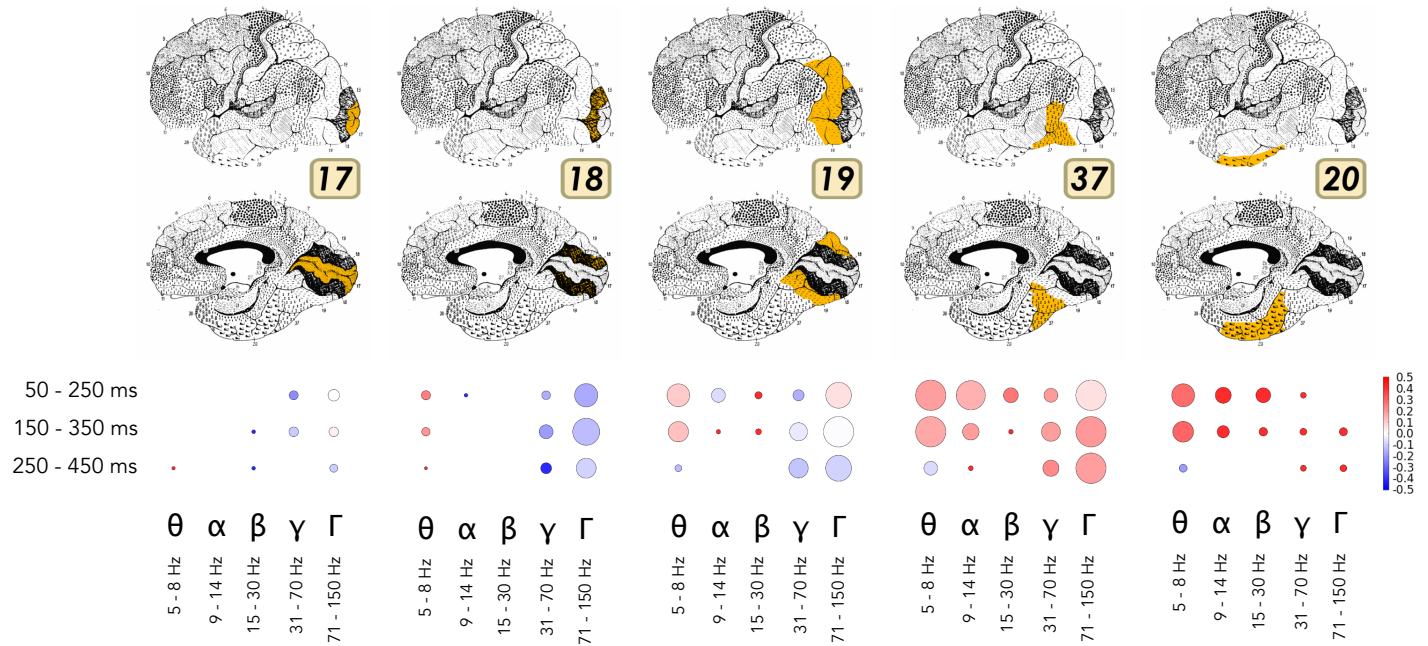

**Figure 5** Area-specific analysis of volume of neural activity and complexity of visual features represented by that activity. Size of the marker shows the sum of correlation coefficients between the area and DCNN for each particular band and time window. Color codes the ratio of complex visual features to simple visual features, i.e. the comparison between the activity that correlates with the higher layers (*conv5*, *fc6*, *fc7*) of DCNN to the lower layers (*conv1*, *conv2*, *conv3*). Intensive red means that the activity was correlating more with the activity of higher layers of DCNN, while the intensive blue indicates the dominance of correlation with the lower areas. If the color is close to white then the activations of both lower and higher layers of DCNN were correlating with the brain responses in approximately equal proportion.

## 1 Activity in theta and beta bands is not aligned to the 2 DCNN

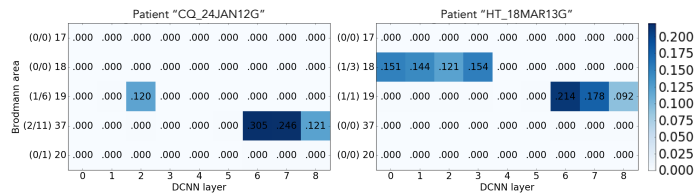

**Figure 6** Single subject results from two different subjects. The numbers show the sum of correlations normalized by the number of probes in an area. On the left plot we see that the only probe (with significantly correlating activity) in Brodmann area 19 is mapped to the second convolutional layer of DCNN, while the activity in Brodmann area 37, which is located further along the ventral stream, is mapped to the higher layers of DCNN. The same trend is seen on the right plot. The numbers on the left of each subplot show the number of significantly correlating probes in each area out of the total number of responsive probes in that area, and the Brodmann area number.

3 The results for all frequency bands are presented in Figures 3  
4 and 4. We can see that the alignment was present across all time  
5 windows in the gamma range and in early time window in the  
6 alpha range – the alignment was weaker and was not statistically  
7 significant in theta and beta frequency bands.

To investigate the involvement of each frequency band more  
1 closely we analyzed each visual area separately. Figure 5 shows  
2 the volume of activity in each area (size of the marker on the  
3 figure) and whether that activity was more correlated with the  
4 complex visual features (red color) or simple features (blue color).  
5 In our findings the role of the earliest area (17) was minimal,  
6 however that might be explained by a very low number of elec-  
7 trodes in that area in our dataset (less than 1%). One can see  
8 from Figure 5 that activity in theta frequency in time windows  
9 50 – 250 ms and 150 – 350 ms had large volume and correlated  
10 with the higher layers of DCNN in higher visual areas (19, 37,  
11 20) of the ventral stream. In general, in areas 37 and 20 all fre-  
12 quency bands carried information about high level features in the  
13 early time windows. This implies that already at early stages of  
14 processing the information about complex features was present  
15 in those areas.  
16

## 17 Gamma activity is more specific to convolutional 18 layers, while the activity in lower frequency bands is 19 more specific to fully connected layers

We analysed volume and specificity of brain activity that corre-  
20 lates with each layer of DCNN separately to see if any bands or  
21 time windows are specific to particular level of hierarchy of visual  
22 processing in DCNN. Figure 7 presents a visual summary of this  
23 analysis. In the “Methods” section we have defined total volume  
24 of visual activity in layers  $L$ . We used this measure to quantify  
25 the activity in low and high gamma bands. We noticed that while  
26

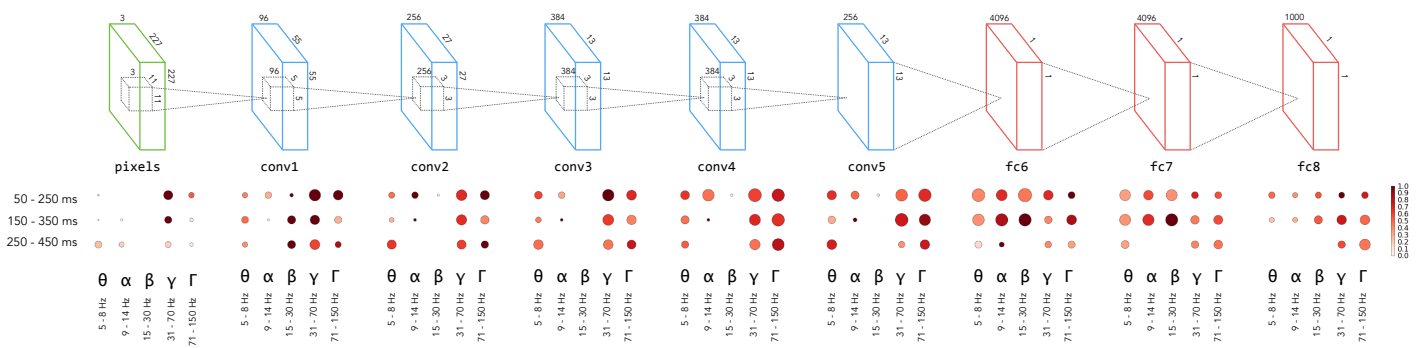

**Figure 7** Specificity of neural responses across frequency bands and time windows for each layer of DCNN. Size of a marker is the total activity mapped to this layer and the intensity of the color is the specificity of the activity to visual areas.

1 the fraction of gamma activity that is mapped to convolutional  
 2 layers is high ( $\frac{V_{\{\text{conv1} \dots \text{conv5}\}}^{\gamma, \Gamma}}{V_{\{\text{all bands}\}}^{\gamma, \Gamma}} = 0.70$ ), this fraction diminished in  
 3 fully connected layers **fc6** and **fc7** ( $\frac{V_{\{\text{fc6}, \text{fc7}\}}^{\gamma, \Gamma}}{V_{\{\text{all bands}\}}^{\gamma, \Gamma}} = 0.37$ ). Note that  
 4 **fc8** was excluded as it represents class label probabilities and  
 5 does not carry information about visual features of the objects.  
 6 On the other hand the activity in lower frequency bands (theta,  
 7 alpha, beta) showed the opposite trend – fraction of volume in  
 8 convolutional layers was 0.30, while in fully connected it grewed  
 9 to 0.63. This observation highlighted the fact that visual features  
 10 extracted by convolutional filters of DCNN carry the signal that  
 11 is more similar to the signal carried by gamma frequency bands,  
 12 while the fully connected layers that do not directly correspond  
 13 to intuitive visual features, carry information that has more in  
 14 common with the activity in the lower frequency bands.

## 15 Discussion

16 Previous work has established a correspondence between hierar-  
 17 chy of the DCNN and the fMRI responses measured across the  
 18 human visual areas (Güçlü and van Gerven, 2015; Eickenberg  
 19 et al., 2016; Seibert et al., 2016; Cichy et al., 2016b). Studying  
 20 intracranial recordings allowed us to extend previous findings by  
 21 assessing the alignment between the DCNN and cortical electro-  
 22 physiological signals at different frequency bands. As there is a  
 23 quantifiable increase of the complexity of features along the lay-  
 24 ers of the DCNN, any signal that is aligned to the DCNN has  
 25 to carry similarly increasingly complex features built-up during  
 26 visual object recognition. We observed that the lower layers of  
 27 the DCNN explained gamma band signals from earlier visual  
 28 areas, while higher layers of the DCNN, responsive for more  
 29 complex features, matched with the gamma band signals from  
 30 higher visual areas. Hence, one can conclude that gamma band  
 31 carries increasingly complex features required for object recog-  
 32 nition along the ventral visual pathway. This finding agrees with  
 33 the previous work that has given a central role for gamma band  
 34 activity in visual object recognition (Singer and Gray, 1995;  
 35 Singer, 1999; Fisch et al., 2009) and feedforward communication  
 36 (Van Kerkoerle et al., 2014; Bastos et al., 2015; Michalareas et  
 37 al., 2016). However, importantly, our results show that gamma  
 38 activity reflects not only object recognition per se but also the

feature transformations that are computed on the way towards  
 explicit object representations.

## Low vs high gamma in object recognition

We observed significant alignment to the DCNN in both low  
 and high gamma bands. Previous studies have shown that low  
 and high gamma frequencies are functionally different: while  
 low gamma is more related to classic gamma oscillations, high  
 frequencies seem to reflect local spiking activity rather than oscil-  
 lations (Manning et al., 2009; Ray and Maunsell, 2011). In the  
 current work we approached the data analysis from the machine  
 learning perspective and remained agnostic with respect to the  
 oscillatory nature of underlying signals. Importantly, we found  
 that numerically the alignment to the DCNN was stronger in  
 low gamma frequencies. However, high gamma was more promi-  
 nent when considering volume and specificity to visual areas. The  
 most striking difference between the low and high gamma with  
 regard to specificity was in the earliest time window 50-250 ms  
 where the correlation between the DCNN and high gamma was  
 almost exclusive to visual areas.

## The role of alpha activity in object recognition

Another finding from our work was that alpha band responses  
 were also aligned to the DCNN. This result implies that not only  
 gamma, but also the alpha band is a channel for increasingly  
 complex feature transformation during visual object recogni-  
 tion. Prior studies have shown that feedforward activity from  
 lower to higher visual areas is carried by the gamma frequency  
 whereas the alpha-beta band reflects feedback signals from higher  
 to lower visual areas (Van Kerkoerle et al., 2014; Bastos et al.,  
 2015; Michalareas et al., 2016). Such network mechanisms have  
 been captured by recent large-scale modelling (Mejias et al.,  
 2016). While our results from the gamma frequency converge  
 towards these previous findings, the alignment of alpha band  
 activity with DCNN is interpreted differently. Namely, although  
 the DCNN is a purely feedforward network it is important to  
 notice that the alignment between electrophysiological signals  
 and the DCNN does not imply that the respective signals have  
 to reflect feedforward computations. Such alignment only means  
 that the progressive changes in representational geometry along



1 the processing hierarchy are similar to the DCNN. In other  
2 words, it is possible that the activity patterns observed in the  
3 alpha frequency are a result of recurrent computations, but their  
4 outcome representational geometry resembles that of the DCNN.  
5 Hence, the findings also coherently fit with results demonstrating  
6 that alpha responses carry signal content that is not sensory in  
7 origin but contributes to the shaping and interpretation of sensory  
8 information in perceptual recognition, i.e. perceptual priors  
9 (Mayer et al., 2016; Samaha et al., 2016). Within the predictive  
10 coding framework feedback activity is not an unspecific mod-  
11 ulatory signal but rather has to signal specific contents from  
12 higher to lower levels of the processing hierarchy (Bastos et  
13 al., 2012). Therefore, within this theoretical framework, a specific  
14 representational geometry is expected even from a feedback  
15 channel.

16 The question whether alpha reflects feedforward or feedback  
17 computations is directly related to the issue whether the current  
18 alpha results could be explained by the intracranial ERPs. In  
19 particular, as ERPs strongly influence the alpha frequency, then  
20 a feedforward propagation of ERPs along the ventral pathway  
21 could in principle lead to the observed alpha alignment. If this  
22 propagation would be feedforward, i.e. if ERP peaks would occur  
23 earlier in lower and later in higher areas, then the observed alpha  
24 results would rather favor a feedforward interpretation.

25 To investigate this issue we inspected the ERP traces of  
26 individual electrodes but could not find any evidence for such  
27 alignment of ERP peaks along the ventral pathway. We note  
28 that the issue of ERPs warrants further investigation, in particular  
29 as the ERPs have been shown to have equal response  
30 selectivity to alpha and gamma frequencies (Vidal et al., 2010).  
31 Importantly, these previous results also indicated that ERPs do  
32 not explain the results in the alpha band as the category selective  
33 information in the ERPs and the alpha and gamma bands  
34 was mainly contained in non-overlapping electrodes (Vidal et al.,  
35 2010). Taken together, we conclude that our alpha effects were  
36 likely not caused by feedforward propagation of ERP peaks. Our  
37 present findings thus call for a reevaluation of the role of the  
38 alpha band in visual object recognition.

## 39 Limitations

40 The present work relies on data pooled over the recordings  
41 from 81 subjects. Hence, the correspondence we found between  
42 responses at different frequency bands and layers of DCNN is  
43 distributed over many subjects. While it is expected that single  
44 subjects show similar mappings (see also Figure 6), the variability  
45 in number and location of recording electrodes in individual subjects  
46 makes it difficult a full single-subject analysis with this type  
47 of data. We also note that the mapping between electrode locations  
48 and Brodmann areas is approximate and the exact mapping  
49 would require individual anatomical reconstructions and more  
50 refined atlases.

## 51 Future work

52 Intracranial recordings are both precisely localized in space and  
53 time, thus allowing us to explore phenomena not observable with  
54 fMRI. In this work we investigated the correlation of DCNN

activity with five broad frequency bands and three time windows. 1  
Our next steps will include the analysis of the activity on a more 2  
granular temporal and spectral scale. Replacing representation 3  
similarity analysis with a predictive model (such as regularized 4  
linear regression) will allow us to explore which visual features 5  
elicited the highest responses in the visual cortex. 6

## Acknowledgements

7  
8 IK, RV and JA thank the financial support from the Estonian  
9 Research Council through the personal research grants PUT438  
10 and PUT1476. This work was supported by the Estonian Centre  
11 of Excellence in IT (EXCITE), funded by the European Regional  
12 Development Fund.

## References

- 13  
14 Bastos AM, Usrey WM, Adams RA, Mangun GR, Fries P, Friston  
15 KJ (2012) Canonical microcircuits for predictive coding. *Neu-*  
16 *ron* 76:695–711.  
17 Bastos AM, Vezoli J, Bosman CA, Schoffelen JM, Oostenveld R, Dow-  
18 dall JR, De Weerd P, Kennedy H, Fries P (2015) Visual areas exert  
19 feedforward and feedback influences through distinct frequency  
20 channels. *Neuron* 85:390–401.  
21 Brodmann K (1909) *Vergleichende Lokalisationslehre der Groshirn-*  
22 *rinde* Barth.  
23 Cichy RM, Khosla A, Pantazis D, Torralba A, Oliva A (2016a)  
24 Deep neural networks predict hierarchical spatio-temporal cortical  
25 dynamics of human visual object recognition. *arXiv preprint*  
26 *arXiv:1601.02970* .  
27 Cichy RM, Khosla A, Pantazis D, Torralba A, Oliva A (2016b)  
28 Comparison of deep neural networks to spatio-temporal cortical  
29 dynamics of human visual object recognition reveals hierarchical  
30 correspondence. *Scientific reports* 6.  
31 Daubechies I (1990) The wavelet transform, time-frequency local-  
32 ization and signal analysis. *IEEE transactions on information*  
33 *theory* 36:961–1005.  
34 Delorme A, Makeig S (2004) Eeglab: an open source toolbox for anal-  
35 ysis of single-trial eeg dynamics including independent component  
36 analysis. *Journal of neuroscience methods* 134:9–21.  
37 DiCarlo JJ, Zoccolan D, Rust NC (2012) How does the brain solve  
38 visual object recognition? *Neuron* 73:415–434.  
39 Eickenberg M, Gramfort A, Varoquaux G, Thirion B (2016) Seeing it  
40 all: Convolutional network layers map the function of the human  
41 visual system. *NeuroImage* .  
42 Fisch L, Privman E, Ramot M, Harel M, Nir Y, Kipervasser S,  
43 Andelman F, Neufeld MY, Kramer U, Fried I et al. (2009) Neural  
44 ignition: enhanced activation linked to perceptual awareness in  
45 human ventral stream visual cortex. *Neuron* 64:562–574.  
46 Genovese CR, Lazar NA, Nichols T (2002) Thresholding of statisti-  
47 cal maps in functional neuroimaging using the false discovery rate.  
48 *Neuroimage* 15:870–878.  
49 Gray CM, Singer W (1989) Stimulus-specific neuronal oscillations  
50 in orientation columns of cat visual cortex. *Proceedings of the*  
51 *National Academy of Sciences* 86:1698–1702.  
52 Güçlü U, van Gerven MA (2015) Deep neural networks reveal a gra-  
53 dient in the complexity of neural representations across the ventral  
54 stream. *The Journal of Neuroscience* 35:10005–10014.

- 1 Jia Y, Shelhamer E, Donahue J, Karayev S, Long J, Girshick R, 1  
2 Guadarrama S, Darrell T (2014) Caffe: Convolutional architecture 2  
3 for fast feature embedding. *arXiv preprint arXiv:1408.5093* .
- 4 Khaligh-Razavi SM, Kriegeskorte N (2014) Deep supervised, but not 3  
5 unsupervised, models may explain it cortical representation. *PLoS* 4  
6 *Comput Biol* 10:e1003915.
- 7 Kriegeskorte N (2015) Deep neural networks: a new framework 5  
8 for modeling biological vision and brain information processing. 6  
9 *Annual Review of Vision Science* 1:417–446.
- 10 Kriegeskorte N, Mur M, Bandettini PA (2008) Representational sim- 7  
11 ilarity analysis-connecting the branches of systems neuroscience. 8  
12 *Frontiers in systems neuroscience* 2:4.
- 13 Krizhevsky A, Sutskever I, Hinton GE (2012) Imagenet classification 9  
14 with deep convolutional neural networks In *Advances in neural* 10  
15 *information processing systems*, pp. 1097–1105.
- 16 Lachaux JP, George N, Tallon-Baudry C, Martinerie J, Hugueville 11  
17 L, Minotti L, Kahane P, Renault B (2005) The many faces of 12  
18 the gamma band response to complex visual stimuli. *Neuroim-* 13  
19 *age* 25:491–501.
- 20 Manning JR, Jacobs J, Fried I, Kahana MJ (2009) Broadband shifts in 14  
21 local field potential power spectra are correlated with single-neuron 15  
22 spiking in humans. *Journal of Neuroscience* 29:13613–13620.
- 23 Mayer A, Schwiedrzik CM, Wibral M, Singer W, Melloni L (2016) 16  
24 Expecting to see a letter: alpha oscillations as carriers of top-down 17  
25 sensory predictions. *Cerebral Cortex* 26:3146–3160.
- 26 Mejias JF, Murray JD, Kennedy H, Wang XJ (2016) Feedforward and 18  
27 feedback frequency-dependent interactions in a large-scale laminar 19  
28 network of the primate cortex. *Science Advances* 2:e1601335.
- 29 Michalareas G, Vezoli J, Van Pelt S, Schoffelen JM, Kennedy H, 20  
30 Fries P (2016) Alpha-beta and gamma rhythms subserve feed- 21  
31 back and feedforward influences among human visual cortical areas. 22  
32 *Neuron* 89:384–397.
- 33 Ray S, Maunsell JH (2011) Different origins of gamma rhythm 23  
34 and high-gamma activity in macaque visual cortex. *PLoS* 24  
35 *Biol* 9:e1000610.
- 36 Rorden C (2007) Mricron [computer software].
- 37 Russakovsky O, Deng J, Su H, Krause J, Satheesh S, Ma S, Huang 25  
38 Z, Karpathy A, Khosla A, Bernstein M, Berg AC, Fei-Fei L (2015) 26  
39 ImageNet Large Scale Visual Recognition Challenge. *International* 27  
40 *Journal of Computer Vision (IJCV)* 115:211–252.
- 41 Samaha J, Boutonnet B, Lupyan G (2016) How prior knowledge pre- 28  
42 pares perception: Prestimulus oscillations carry perceptual expect- 29  
43 ations and influence early visual responses. *bioRxiv* p. 076687.
- 44 Seibert D, Yamins DL, Ardila D, Hong H, DiCarlo JJ, Gardner JL 30  
45 (2016) A performance-optimized model of neural responses across 31  
46 the ventral visual stream. *bioRxiv* p. 036475.
- 47 Singer W (1999) Neuronal synchrony: a versatile code for the definition 32  
48 of relations? *Neuron* 24:49–65.
- 49 Singer W, Gray CM (1995) Visual feature integration and the temporal 33  
50 correlation hypothesis. *Annual review of neuroscience* 18:555–586.
- 51 Talairach J, Tournoux P (1993) *Referentially oriented cerebral MRI* 34  
52 *anatomy: an atlas of stereotaxic anatomical correlations for gray* 35  
53 *and white matter* Thieme.
- 54 Van Kerkoerle T, Self MW, Dagnino B, Gariel-Mathis MA, Poort 36  
55 J, Van Der Togt C, Roelfsema PR (2014) Alpha and gamma 37  
56 oscillations characterize feedback and feedforward processing in 38  
57 monkey visual cortex. *Proceedings of the National Academy of* 39  
58 *Sciences* 111:14332–14341.
- Vidal JR, Ossandón T, Jerbi K, Dalal SS, Minotti L, Ryvlin P, 1  
Kahane P, Lachaux JP (2010) Category-specific visual responses: 2  
an intracranial study comparing gamma, beta, alpha, and erp 3  
response selectivity. *Frontiers in human neuroscience* 4:195. 4  
Yamins DL, DiCarlo JJ (2016) Using goal-driven deep learning models 5  
to understand sensory cortex. *Nature neuroscience* 19:356–365. 6  
Yamins DL, Hong H, Cadieu CF, Solomon EA, Seibert D, DiCarlo 7  
JJ (2014) Performance-optimized hierarchical models predict neural 8  
responses in higher visual cortex. *Proceedings of the National* 9  
*Academy of Sciences* 111:8619–8624. 10
